# Supplementary material
Source: PubMed Central journal article supplement (PMC3638902)
Supplement: NIHMS450785-supplement-01.pdf [file NIHMS450785-supplement-01.pdf]

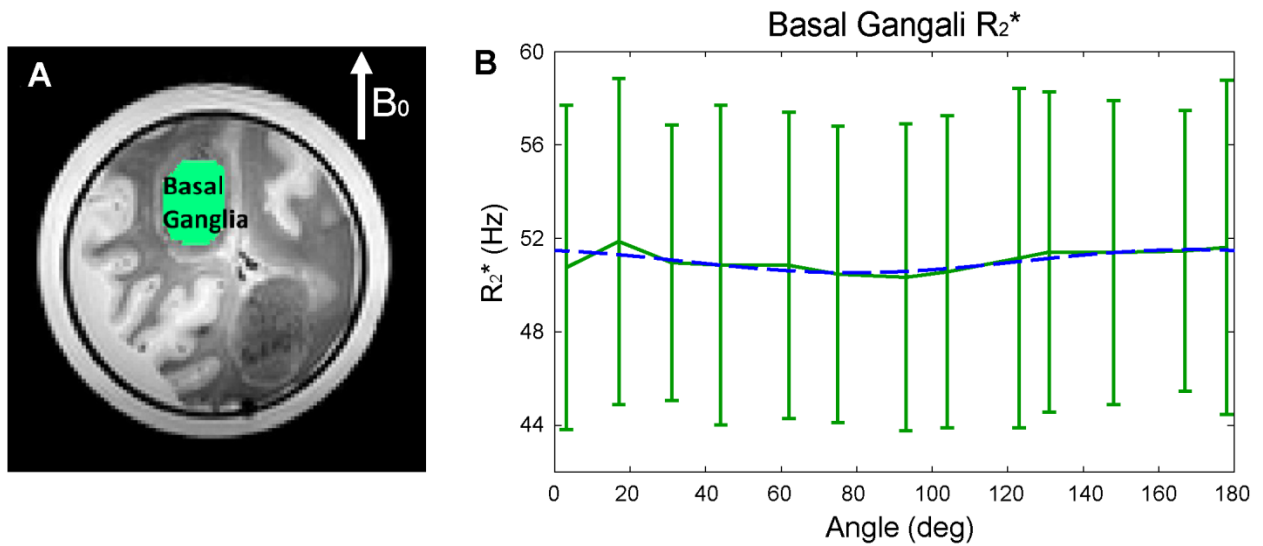

Supplementary Figure 1. The orientation dependent  $R_2^*$  in basal ganglia. (A) A basal ganglia ROI at  $0^\circ$  orientation (the neighboring corpus callosum is parallel to  $B_0$ ). (B) The  $R_2^*$  measurements (green solid line) and the suscep-aniso model fitted curve (blue dashed line). The fitting resulted in a relatively poor fit (maximum  $R^2 = 0.51$  when the orientation was rotated by  $101^\circ$ ), a small  $\Delta R_2^*$  estimation ( $= -1.0$  Hz from the fitted line), and zero coefficient for the  $\cos 4\theta$  term. These results suggest that the basal ganglia ROI has limited, if any,  $B_0$  orientation dependent  $R_2^*$  contrast. The small negative offset may have been introduced by the field inhomogeneity.
