# Supplementary material
Source: PubMed Central journal article supplement (PMC3638902)
Supplement: NIHMS450785-supplement-02.pdf [file NIHMS450785-supplement-02.pdf]

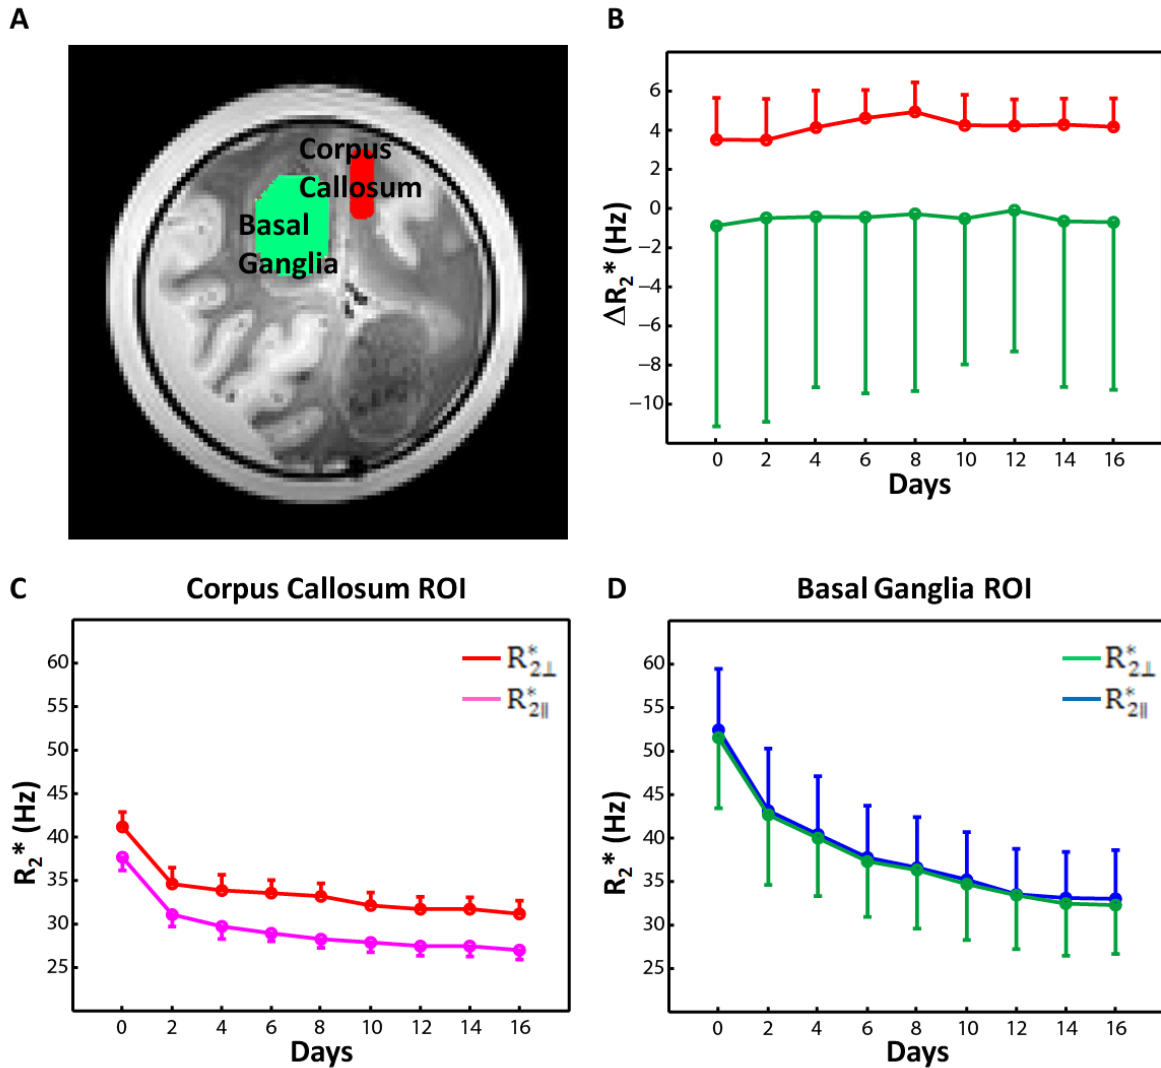

Supplementary Figure 2. Iron extraction experiment. (A) Two ROIs, corpus callosum and basal ganglia, in the specimen. (B)  $\Delta R_2^*$  changes over 16 days in the corpus callosum (red line) and the basal ganglia (green line). (C)  $R_2^*$  changes in the corpus callosum (red line when the corpus callosum orientation is perpendicular to  $B_0$ , and pink line when it is parallel to  $B_0$ ). (D)  $R_2^*$  changes in the basal ganglia (green line when the corpus callosum orientation was perpendicular to  $B_0$ , and blue line when it was parallel to  $B_0$ ). The single-sided error bar represents a standard deviation. The corpus callosum ROI shows consistently large  $\Delta R_2^*$  over 16 days. No decrease in

$\Delta R_2^*$  was observed over the whole period when  $\Delta R_2^*$  measurements were compared to the pre-extraction result (day 0). This finding suggests that iron is not the source for the contrast. The measurements show a slight increase in  $\Delta R_2^*$  on day 4 and afterward (on average,  $0.9 \pm 0.3$  Hz increase in  $\Delta R_2^*$  compared to day 0; see Discussion for a potential explanation). In the basal ganglia ROI,  $\Delta R_2^*$  was close to zero in all measurements (on average,  $-0.5 \pm 0.2$  Hz). The small negative offset may have been introduced by the field inhomogeneity. The measurements are summarized below.

| Iron   | Corpus Callosum    |                |                | Basal Ganglia      |                |                 |
|--------|--------------------|----------------|----------------|--------------------|----------------|-----------------|
|        | $R_{2\parallel}^*$ | $R_{2\perp}^*$ | $\Delta R_2^*$ | $R_{2\parallel}^*$ | $R_{2\perp}^*$ | $\Delta R_2^*$  |
| Day 0  | $37.7 \pm 1.5$     | $41.2 \pm 1.7$ | $3.5 \pm 2.1$  | $52.4 \pm 7.0$     | $51.5 \pm 8.1$ | $-0.9 \pm 10.2$ |
| Day 2  | $31.1 \pm 1.4$     | $34.6 \pm 1.9$ | $3.5 \pm 2.1$  | $43.2 \pm 7.1$     | $42.7 \pm 8.0$ | $-0.5 \pm 10.4$ |
| Day 4  | $29.7 \pm 1.4$     | $33.9 \pm 1.8$ | $4.1 \pm 1.9$  | $40.4 \pm 6.7$     | $40.0 \pm 6.7$ | $-0.4 \pm 8.7$  |
| Day 6  | $28.9 \pm 0.9$     | $33.5 \pm 1.5$ | $4.6 \pm 1.4$  | $37.8 \pm 6.0$     | $37.3 \pm 6.4$ | $-0.5 \pm 9.0$  |
| Day 8  | $28.3 \pm 1.0$     | $33.2 \pm 1.5$ | $4.9 \pm 1.5$  | $36.6 \pm 5.8$     | $36.3 \pm 6.7$ | $-0.3 \pm 9.1$  |
| Day 10 | $27.9 \pm 1.1$     | $32.1 \pm 1.5$ | $4.3 \pm 1.6$  | $35.2 \pm 5.5$     | $34.7 \pm 6.4$ | $-0.5 \pm 7.5$  |
| Day 12 | $27.5 \pm 1.1$     | $31.7 \pm 1.4$ | $4.2 \pm 1.3$  | $33.5 \pm 5.2$     | $33.4 \pm 6.2$ | $-0.1 \pm 7.2$  |
| Day 14 | $27.4 \pm 1.2$     | $31.7 \pm 1.4$ | $4.3 \pm 1.3$  | $33.1 \pm 5.3$     | $32.5 \pm 6.0$ | $-0.6 \pm 8.5$  |
| Day 16 | $27.0 \pm 1.1$     | $31.2 \pm 1.5$ | $4.2 \pm 1.5$  | $33.0 \pm 5.6$     | $32.3 \pm 5.6$ | $-0.7 \pm 8.6$  |
